# Supplementary material for: The origin of exo-selectivity in methyl cyanoformate addition onto the CC bond of norbornene in Pd-catalyzed cyanoesterification
Source: Royal Society of Chemistry journal article supplement (doi:10.1039/c4dt00839a), 2014-01-01
Supplement: c4dt00839a1.pdf [file c4dt00839a1.pdf]

**Electronic Supplementary Information for:**

**The Origin of *Exo*-Selectivity in Methyl Cyanoformate Addition onto the C=C Bond of Norbornene in Pd-Catalyzed Cyanoesterification**

*Yasuhiro Okuda*<sup>1</sup>, *Robert K. Szilagy*<sup>2,3</sup>, *Seiji Mori*<sup>3,\*</sup> *Yasushi Nishihara*<sup>1,4\*</sup>

<sup>1</sup>*Division of Chemistry and Biochemistry, Graduate School of Natural Science and Technology, Okayama University, 3-1-1 Tsushima-naka, Okayama 700-8530, Japan*

<sup>2</sup>*Department of Chemistry and Biochemistry, Montana State University, Bozeman MT, 59717, U.S.A*  
(*current address: Department of Analytical Chemistry, University of Pannonia, Veszprem, 8200, Hungary*)

<sup>3</sup>*Faculty of Science, Ibaraki University, 2-1-1 Bunkyo, Mito 310-8512, Japan*

<sup>4</sup>*Japan Science and Technology Agency, ACT-C, 4-1-8 Honcho, Kawaguchi, Saitama 332-0012, Japan*

## Corrections of translational entropy proposed by Whitesides (Refs.10a and 10b)

Absolute values of experimental entropies in solution are larger than those by using Sacker-Tetrode equation, which is a conventional model for gas phase. Translational entropy in solution is proposed by Whitesides and his coworkers, as follows:

$$S_{\text{trans}}^{\text{corrected}} = R \ln \left[ \left( \frac{10^{-15/2} V_{\text{free}}}{N_A^4 [X]} \right) \left( \frac{2\pi MRT e^{5/3}}{h^2} \right)^{3/2} \right] = R \ln \left[ \left( \frac{10^{-15/2} V_{\text{free}}}{N_A^4 [X]} \right) \left( \frac{2\pi MRT e^{5/3}}{h^2} \right)^{3/2} \right] + R \ln V_{\text{free}}$$
$$= S_{\text{trans}} + R \ln V_{\text{free}}$$

$S_{\text{trans}}$  refers gas-phase translational entropy and is given by Sackur-Tetrode equation.

$e$ : elementary electric charge,  $1.60217657 \times 10^{-19}$  C

$h$ : Planck's constant,  $6.62606957 \times 10^{-34}$  m<sup>2</sup> kg s<sup>-1</sup>

$R$ : ideal gas constant,  $8.3144621$  J K<sup>-1</sup> mol<sup>-1</sup>

$M$ : molecular weight, g mol<sup>-1</sup>

$N_A$ : Avogadro's number,  $6.0221413 \times 10^{23}$  mol<sup>-1</sup>

$V_{\text{free}}$ , "free volume" is defined as "the volume occupied by the center of mass of one molecule of liquid moving randomly in a cage that is defined by its nearest neighbors" by a following equation

$$V_{\text{free}} = C_{\text{free}} \left\{ \sqrt[3]{\left( \frac{10^{27}}{[X] N_A} \right)} - \sqrt[3]{V_{\text{mole}}} \right\}^3$$

Since density of toluene at 25 °C is 862.3 g dm<sup>-3</sup> from *CRC Handbook of Chemistry and Physics*, 91st Edition, Haynes, W. M. Ed. 2010, and  $M$  for toluene is 92.14 g mol<sup>-1</sup>, thus  $[X] = 9.3585$  (mol dm<sup>-3</sup>).  $V_{\text{mole}} = 144.5189$  Å<sup>3</sup> by volume calculations by using Gaussian 09 program,  $V_{\text{free}}$  is calculated as 0.4102 Å<sup>3</sup> when  $C_{\text{free}} = 8$ . Then,  $R \ln V_{\text{free}}$  for toluene is -50.464 J/mol K.

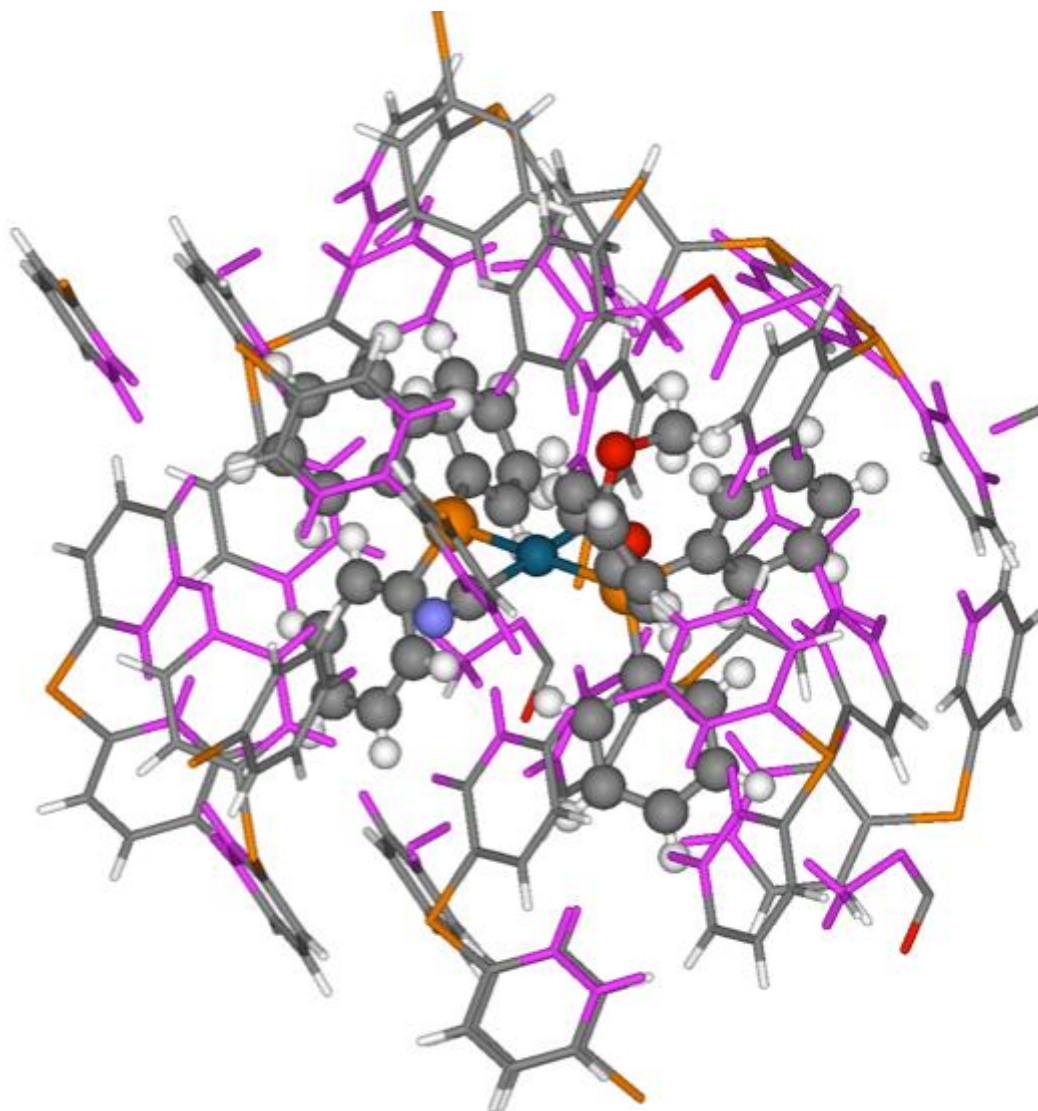

**Figure S1:** Network of crystal packing interactions of **2t2P** DAPRES (Ref. 3d) with 3.5 Å environment (see atomic positional coordinates on the next pages) around a central molecule (ball and stick presentation) highlighted with pink color

463  
DAPRES 3x3x3  
P 12.5766 26.9888 20.8284  
C 12.0863 28.7238 20.5338  
C 12.1001 29.6576 21.5783  
C 11.7347 30.9711 21.3530  
C 11.3821 31.3956 20.0890  
C 11.4049 30.4927 19.0411  
C 11.7453 29.1616 19.2571  
H 12.3566 29.3794 22.4495  
H 11.7350 31.5879 22.0763  
H 11.1241 32.2985 19.9423  
H 11.1822 30.7844 18.1641  
H 11.7529 28.5434 18.5350  
N 14.3426 46.6004 20.7337  
C 14.4995 47.6422 20.8042  
P 5.1443 38.6003 8.0568  
C 6.0279 37.7032 9.3726  
C 7.3766 37.4273 9.2964  
C 8.0457 36.8245 10.3397  
C 7.3637 36.5089 11.4928  
C 6.0171 36.8015 11.5922  
C 5.3530 37.3728 10.5234  
H 7.8513 37.6654 8.5084  
H 8.9713 36.6273 10.2611  
H 7.8121 36.0723 12.2080  
H 5.5606 36.6343 12.4079  
H 4.4201 37.5469 10.5823  
P 0.1506 38.6003 19.6108  
C 0.6409 40.3353 19.9053  
C 0.6271 41.2691 18.8608  
C 0.9925 42.5826 19.0861  
C 1.3451 43.0071 20.3501  
C 1.3223 42.1042 21.3981  
C 0.9819 40.7731 21.1820  
C 0.9965 38.1849 18.0509  
C 2.1851 38.8182 17.6881  
C 2.7998 38.5307 16.4784  
C 2.2382 37.6008 15.6280  
C 1.0751 36.9415 15.9792  
C 0.4513 37.2423 17.1878  
C 1.0343 37.7032 20.9267  
C 2.3830 37.4273 20.8504  
C 3.0521 36.8245 21.8938  
C 2.3700 36.5089 23.0469  
C 1.0234 36.8015 23.1462  
C 0.3593 37.3728 22.0775  
H 0.3706 40.9909 17.9896  
H 0.9922 43.1994 18.3628  
H 1.6031 43.9100 20.4969  
H 1.5450 42.3959 22.2750  
H 0.9743 40.1549 21.9042  
H 2.5756 39.4536 18.2773  
H 3.6089 38.9682 16.2415  
H 2.6486 37.4215 14.7903  
H 0.7096 36.2790 15.4050  
H -0.3574 36.8038 17.4293  
H 2.8577 37.6654 20.0624  
H 3.9777 36.6273 21.8152  
H 2.8185 36.0723 23.7620  
H 0.5670 36.6343 23.9619  
H -0.5735 37.5469 22.1364  
C 12.1468 36.6914 9.2987  
C 12.3724 37.2002 10.5939  
C 11.9913 36.4645 11.7019  
C 11.4062 35.2239 11.5517  
C 11.2095 34.7103 10.2739  
C 11.5701 35.4506 9.1543  
H 12.7843 38.0509 10.7002  
H 12.1380 36.8154 12.5731  
H 11.1255 34.7300 12.3131  
H 10.8335 33.8452 10.1652  
Pd 9.9596 38.1062 19.5527  
P 12.2326 38.6003 19.6108  
P 7.6741 37.7114 19.4323  
O 9.6339 40.7886 18.5234  
O 9.5149 40.6286 20.7164  
N 10.4666 34.9889 19.7054

C 10.3097 36.0307 19.6349  
C 9.6456 40.0968 19.5252  
C 9.5024 42.1686 20.4518  
C 12.7229 40.3353 19.9053  
C 12.7091 41.2691 18.8608  
C 13.0745 42.5826 19.0861  
C 13.4271 43.0071 20.3501  
C 13.4043 42.1042 21.3981  
C 13.0639 40.7731 21.1820  
C 13.0785 38.1849 18.0509  
C 14.2671 38.8182 17.6881  
C 14.8818 38.5307 16.4784  
C 14.3202 37.6008 15.6280  
C 13.1571 36.9415 15.9792  
C 12.5333 37.2423 17.1878  
C 13.1163 37.7032 20.9267  
C 14.4650 37.4273 20.8504  
C 15.1341 36.8245 21.8938  
C 14.4520 36.5089 23.0469  
C 13.1054 36.8015 23.1462  
C 12.4413 37.3728 22.0775  
C 6.5204 39.1310 19.4235  
C 6.5888 40.0088 18.3455  
C 5.6956 41.0548 18.2346  
C 4.7320 41.2536 19.2005  
C 4.6586 40.4090 20.2901  
C 5.5544 39.3402 20.4091  
C 7.1532 36.6914 20.8527  
C 7.3787 37.2002 22.1479  
C 6.9977 36.4645 23.2560  
C 6.4126 35.2239 23.1058  
C 6.2158 34.7103 21.8279  
C 6.5764 35.4506 20.7083  
C 7.1539 36.8066 17.9353  
C 5.7941 36.7105 17.6292  
C 5.3731 36.0509 16.4899  
C 6.2982 35.4813 15.6326  
C 7.6510 35.5637 15.9353  
C 8.0745 36.2239 17.0746  
H 10.3892 42.5074 20.4911  
H 8.9736 42.5863 21.1219  
H 9.1318 42.3518 19.5957  
H 12.4526 40.9909 17.9896  
H 13.0742 43.1994 18.3628  
H 13.6851 43.9100 20.4969  
H 13.6270 42.3959 22.2750  
H 13.0563 40.1549 21.9042  
H 14.6576 39.4536 18.2773  
H 15.6910 38.9682 16.2415  
H 14.7306 37.4215 14.7903  
H 12.7916 36.2790 15.4050  
H 11.7246 36.8038 17.4293  
H 14.9397 37.6654 20.0624  
H 16.0597 36.6273 21.8152  
H 14.9005 36.0723 23.7620  
H 12.6490 36.6343 23.9619  
H 11.5085 37.5469 22.1364  
H 7.2639 39.8785 17.6892  
H 5.7341 41.6319 17.4801  
H 4.1265 41.9825 19.1254  
H 3.9966 40.5474 20.9579  
H 5.5141 38.7476 21.1508  
H 7.7907 38.0509 22.2542  
H 7.1443 36.8154 24.1272  
H 6.1318 34.7300 23.8672  
H 5.8399 33.8452 21.7193  
H 6.4257 35.1016 19.8383  
H 5.1590 37.1150 18.2069  
H 4.4447 35.9910 16.2981  
H 6.0126 35.0273 14.8481  
H 8.2893 35.1666 15.3530  
H 9.0013 36.2836 17.2698  
P 7.2390 38.6003 31.1648  
C 8.0849 38.1849 29.6049  
C 9.2735 38.8182 29.2421  
C 9.8881 38.5307 28.0324  
C 9.3266 37.6008 27.1820  
C 8.1635 36.9415 27.5333

C 7.5397 37.2423 28.7418  
H 9.6640 39.4536 29.8314  
H 10.6973 38.9682 27.7956  
H 9.7369 37.4215 26.3444  
H 7.7979 36.2790 26.9591  
H 6.7309 36.8038 28.9833  
P 19.7561 37.7114 19.4323  
C 18.6024 39.1310 19.4235  
C 18.6708 40.0088 18.3455  
C 17.7776 41.0548 18.2346  
C 16.8140 41.2536 19.2005  
C 16.7406 40.4090 20.2901  
C 17.6364 39.3402 20.4091  
C 19.2352 36.6914 20.8527  
C 19.4607 37.2002 22.1479  
C 19.0797 36.4645 23.2560  
C 18.4946 35.2239 23.1058  
C 18.2978 34.7103 21.8279  
C 18.6584 35.4506 20.7083  
C 19.2359 36.8066 17.9353  
C 17.8761 36.7105 17.6292  
C 17.4551 36.0509 16.4899  
C 18.3802 35.4813 15.6326  
C 19.7330 35.5637 15.9353  
C 20.1565 36.2239 17.0746  
H 19.3459 39.8785 17.6892  
H 17.8161 41.6319 17.4801  
H 16.2085 41.9825 19.1254  
H 16.0786 40.5474 20.9579  
H 17.5961 38.7476 21.1508  
H 19.8727 38.0509 22.2542  
H 19.2263 36.8154 24.1272  
H 18.2138 34.7300 23.8672  
H 17.9219 33.8452 21.7193  
H 18.5077 35.1016 19.8383  
H 17.2410 37.1150 18.2069  
H 16.5267 35.9910 16.2981  
H 18.0946 35.0273 14.8481  
H 20.3713 35.1666 15.3530  
H 21.0833 36.2836 17.2698  
P 14.7624 37.7114 30.9863  
C 14.2423 36.8066 29.4894  
C 12.8825 36.7105 29.1832  
C 12.4614 36.0509 28.0440  
C 13.3865 35.4813 27.1867  
C 14.7394 35.5637 27.4894  
C 15.1628 36.2239 28.6286  
H 12.2474 37.1150 29.7609  
H 11.5331 35.9910 27.8522  
H 13.1010 35.0273 26.4021  
H 15.3777 35.1666 26.9071  
H 16.0897 36.2836 28.8239  
P 8.6885 42.6802 13.8338  
P 4.1299 43.5691 13.6553  
O 6.0897 40.4919 12.7464  
O 5.9707 40.6519 14.9394  
C 6.1014 41.1837 13.7482  
C 5.9582 39.1119 14.6748  
C 9.1787 40.9452 14.1283  
C 9.1650 40.0114 13.0838  
C 9.5303 38.6979 13.3091  
C 9.8829 38.2734 14.5731  
C 9.8601 39.1763 15.6211  
C 9.5198 40.5074 15.4050  
C 9.5721 43.5773 15.1497  
C 10.9208 43.8532 15.0734  
C 11.5899 44.4560 16.1167  
C 10.9079 44.7716 17.2698  
C 9.5613 44.4790 17.3692  
C 8.8971 43.9077 16.3004  
C 3.6090 44.5891 15.0757  
C 3.8345 44.0803 16.3709  
C 3.4535 44.8160 17.4790  
C 2.8684 46.0565 17.3288  
C 2.6716 46.5702 16.0509  
C 3.0323 45.8299 14.9313  
H 6.8450 38.7731 14.7141  
H 5.4294 38.6942 15.3449

H 5.5876 38.9287 13.8186  
H 8.9084 40.2896 12.2126  
H 9.5300 38.0811 12.5858  
H 10.1409 37.3705 14.7199  
H 10.0828 38.8846 16.4980  
H 9.5121 41.1256 16.1271  
H 11.3955 43.6151 14.2854  
H 12.5155 44.6532 16.0382  
H 11.3563 45.2082 17.9850  
H 9.1048 44.6462 18.1849  
H 7.9643 43.7336 16.3594  
H 4.2465 43.2296 16.4772  
H 3.6001 44.4651 18.3501  
H 2.5877 46.5505 18.0902  
H 2.2957 47.4353 15.9423  
H 2.8815 46.1789 14.0613  
P 3.6948 42.6802 25.3878  
C 4.1850 40.9452 25.6823  
C 4.1713 40.0114 24.6378  
C 4.5367 38.6979 24.8631  
C 4.8893 38.2734 26.1272  
C 4.8665 39.1763 27.1751  
C 4.5261 40.5074 26.9591  
C 4.5407 43.0956 23.8279  
C 5.7293 42.4623 23.4651  
C 6.3440 42.7498 22.2554  
C 5.7824 43.6797 21.4050  
C 4.6193 44.3390 21.7563  
C 3.9955 44.0382 22.9648  
H 3.9147 40.2896 23.7667  
H 4.5363 38.0811 24.1399  
H 5.1472 37.3705 26.2739  
H 5.0891 38.8846 28.0521  
H 4.5185 41.1256 27.6812  
H 6.1198 41.8269 24.0544  
H 7.1531 42.3123 22.0185  
H 6.1927 43.8590 20.5674  
H 4.2537 45.0015 21.1820  
H 3.1867 44.4767 23.2063  
P 16.2119 43.5691 13.6553  
O 18.1717 40.4919 12.7464  
O 18.0527 40.6519 14.9394  
C 18.1834 41.1837 13.7482  
C 18.0402 39.1119 14.6748  
C 15.0582 42.1495 13.6465  
C 15.1266 41.2717 12.5685  
C 14.2334 40.2257 12.4576  
C 13.2698 40.0269 13.4235  
C 13.1964 40.8716 14.5130  
C 14.0922 41.9403 14.6320  
C 15.6910 44.5891 15.0757  
C 15.9165 44.0803 16.3709  
C 15.5355 44.8160 17.4790  
C 14.9504 46.0565 17.3288  
C 14.7536 46.5702 16.0509  
C 15.1143 45.8299 14.9313  
H 18.9270 38.7731 14.7141  
H 17.5114 38.6942 15.3449  
H 17.6696 38.9287 13.8186  
H 15.8017 41.4020 11.9122  
H 14.2719 39.6486 11.7031  
H 12.6643 39.2980 13.3484  
H 12.5344 40.7331 15.1809  
H 14.0519 42.5329 15.3738  
H 16.3285 43.2296 16.4772  
H 15.6821 44.4651 18.3501  
H 14.6697 46.5505 18.0902  
H 14.3777 47.4353 15.9423  
H 14.9635 46.1789 14.0613  
Pd 13.5038 43.1743 25.3297  
P 15.7768 42.6802 25.3878  
P 11.2182 43.5691 25.2093  
O 13.1781 40.4919 24.3005  
O 13.0591 40.6519 26.4934  
C 13.1897 41.1837 25.3022  
C 13.0466 39.1119 26.2288  
C 16.2670 40.9452 25.6823

C 16.2533 40.0114 24.6378  
C 16.6187 38.6979 24.8631  
C 16.9713 38.2734 26.1272  
C 16.9485 39.1763 27.1751  
C 16.6081 40.5074 26.9591  
C 16.6227 43.0956 23.8279  
C 17.8113 42.4623 23.4651  
C 18.4260 42.7498 22.2554  
C 17.8644 43.6797 21.4050  
C 16.7013 44.3390 21.7563  
C 16.0775 44.0382 22.9648  
C 10.0646 42.1495 25.2005  
C 10.1330 41.2717 24.1225  
C 9.2397 40.2257 24.0116  
C 8.2761 40.0269 24.9775  
C 8.2027 40.8716 26.0671  
C 9.0985 41.9403 26.1861  
C 10.6981 44.4739 23.7124  
C 9.3383 44.5700 23.4062  
C 8.9173 45.2296 22.2670  
C 9.8424 45.7992 21.4096  
C 11.1952 45.7168 21.7124  
C 11.6186 45.0566 22.8516  
H 13.9333 38.7731 26.2681  
H 12.5177 38.6942 26.8990  
H 12.6760 38.9287 25.3727  
H 15.9967 40.2896 23.7667  
H 16.6183 38.0811 24.1399  
H 17.2292 37.3705 26.2739  
H 17.1711 38.8846 28.0521  
H 16.6005 41.1256 27.6812  
H 18.2018 41.8269 24.0544  
H 19.2351 42.3123 22.0185  
H 18.2747 43.8590 20.5674  
H 16.3357 45.0015 21.1820  
H 15.2687 44.4767 23.2063  
H 10.8081 41.4020 23.4663  
H 9.2783 39.6486 23.2571  
H 7.6707 39.2980 24.9024  
H 7.5408 40.7331 26.7349  
H 9.0582 42.5329 26.9279  
H 8.7032 44.1655 23.9839  
H 7.9889 45.2895 22.0752  
H 9.5568 46.2533 20.6251  
H 11.8335 46.1139 21.1300  
H 12.5455 44.9969 23.0469  
P 1.5090 31.9576 15.2298  
C 2.0299 32.9776 13.8094  
C 1.8043 32.4688 12.5142  
C 2.1854 33.2045 11.4062  
C 2.7704 34.4450 11.5564  
C 2.9672 34.9587 12.8342  
C 2.6066 34.2184 13.9538  
C 2.0291 32.8624 16.7268  
C 3.3889 32.9585 17.0330  
C 3.8099 33.6181 18.1722  
C 2.8848 34.1877 19.0295  
C 1.5320 34.1053 18.7268  
C 1.1086 33.4451 17.5876  
H 1.3924 31.6181 12.4079  
H 2.0387 32.8536 10.5350  
H 3.0512 34.9390 10.7949  
H 3.3432 35.8238 12.9428  
H 2.7573 34.5674 14.8238  
H 4.0240 32.5540 16.4553  
H 4.7383 33.6780 18.3640  
H 3.1704 34.6418 19.8140  
H 0.8937 34.5024 19.3091  
H 0.1817 33.3854 17.3923  
P 9.0324 31.0687 15.0513  
P 13.5910 31.9576 15.2298  
N 10.7985 34.6801 14.9567  
C 10.9553 33.6383 15.0272  
C 8.1865 31.4841 16.6112  
C 6.9979 30.8508 16.9740  
C 6.3832 31.1383 18.1838  
C 6.9448 32.0682 19.0341

C 8.1079 32.7275 18.6829  
C 8.7317 32.4267 17.4743  
C 8.1487 31.9658 13.7354  
C 6.8000 32.2417 13.8117  
C 6.1310 32.8445 12.7684  
C 6.8130 33.1601 11.6153  
C 8.1596 32.8675 11.5159  
C 8.8237 32.2962 12.5847  
C 14.1119 32.9776 13.8094  
C 13.8863 32.4688 12.5142  
C 14.2674 33.2045 11.4062  
C 14.8524 34.4450 11.5564  
C 15.0492 34.9587 12.8342  
C 14.6886 34.2184 13.9538  
C 14.1111 32.8624 16.7268  
C 15.4709 32.9585 17.0330  
C 15.8919 33.6181 18.1722  
C 14.9668 34.1877 19.0295  
C 13.6140 34.1053 18.7268  
C 13.1906 33.4451 17.5876  
H 6.6074 30.2154 16.3848  
H 5.5741 30.7008 18.4206  
H 6.5344 32.2475 19.8718  
H 8.4735 33.3900 19.2571  
H 9.5405 32.8652 17.2329  
H 6.3254 32.0036 14.5997  
H 5.2054 33.0417 12.8469  
H 6.3646 33.5967 10.9001  
H 8.6160 33.0347 10.7002  
H 9.7565 32.1221 12.5257  
H 13.4744 31.6181 12.4079  
H 15.1332 34.9390 10.7949  
H 15.4252 35.8238 12.9428  
H 14.8393 34.5674 14.8238  
H 16.1060 32.5540 16.4553  
H 16.8203 33.6780 18.3640  
H 15.2524 34.6418 19.8140  
H 12.9757 34.5024 19.3091  
H 12.2637 33.3854 17.3923  
P 4.0387 31.0687 26.6054  
P 8.5973 31.9576 26.7839  
N 5.8048 34.6801 26.5108  
C 5.9616 33.6383 26.5812  
C 3.1551 31.9658 25.2895  
C 1.8064 32.2417 25.3657  
C 1.1373 32.8445 24.3224  
C 1.8193 33.1601 23.1693  
C 3.1659 32.8675 23.0700  
C 3.8301 32.2962 24.1387  
C 9.1182 32.9776 25.3634  
C 8.8927 32.4688 24.0682  
C 9.2737 33.2045 22.9602  
C 9.8588 34.4450 23.1104  
C 10.0556 34.9587 24.3883  
C 9.6949 34.2184 25.5079  
H 1.3317 32.0036 26.1537  
H 0.2117 33.0417 24.4010  
H 1.3709 33.5967 22.4541  
H 3.6224 33.0347 22.2542  
H 4.7629 32.1221 24.0798  
H 8.4807 31.6181 23.9619  
H 9.1271 32.8536 22.0890  
H 10.1395 34.9390 22.3490  
H 10.4315 35.8238 24.4969  
H 9.8457 34.5674 26.3779  
P 16.1207 31.0687 26.6054  
C 15.2371 31.9658 25.2895  
C 13.8884 32.2417 25.3657  
C 13.2193 32.8445 24.3224  
C 13.9013 33.1601 23.1693  
C 15.2479 32.8675 23.0700  
C 15.9121 32.2962 24.1387  
H 13.4137 32.0036 26.1537  
H 12.2937 33.0417 24.4010  
H 13.4529 33.5967 22.4541  
H 15.7044 33.0347 22.2542  
H 16.8449 32.1221 24.0798

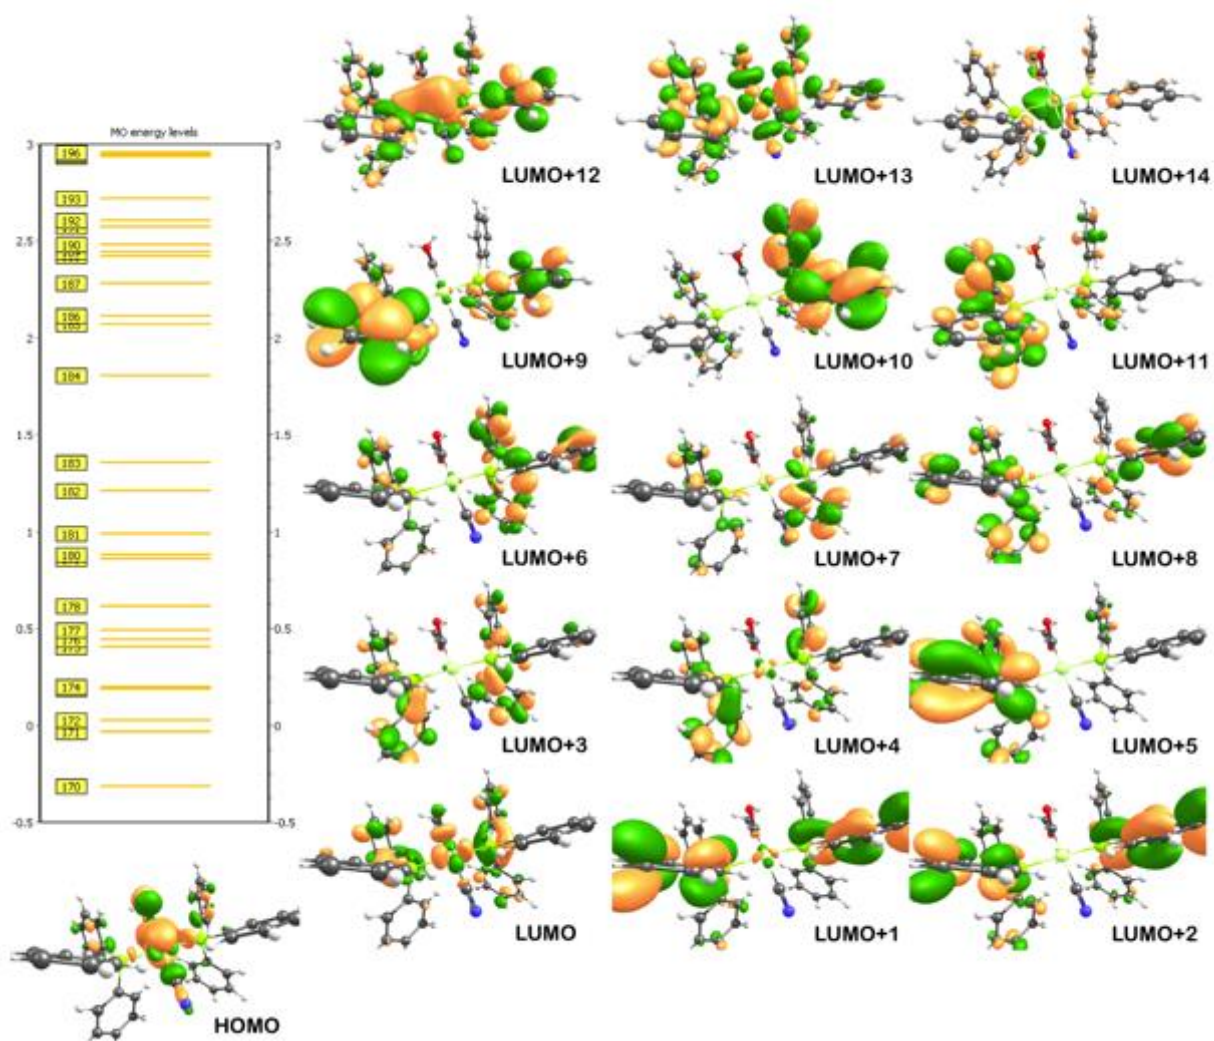

Figure S2: Molecular orbital analysis of complex 2t2P from BHandHLYP/def2TZVP/PCM(toluene) calculation

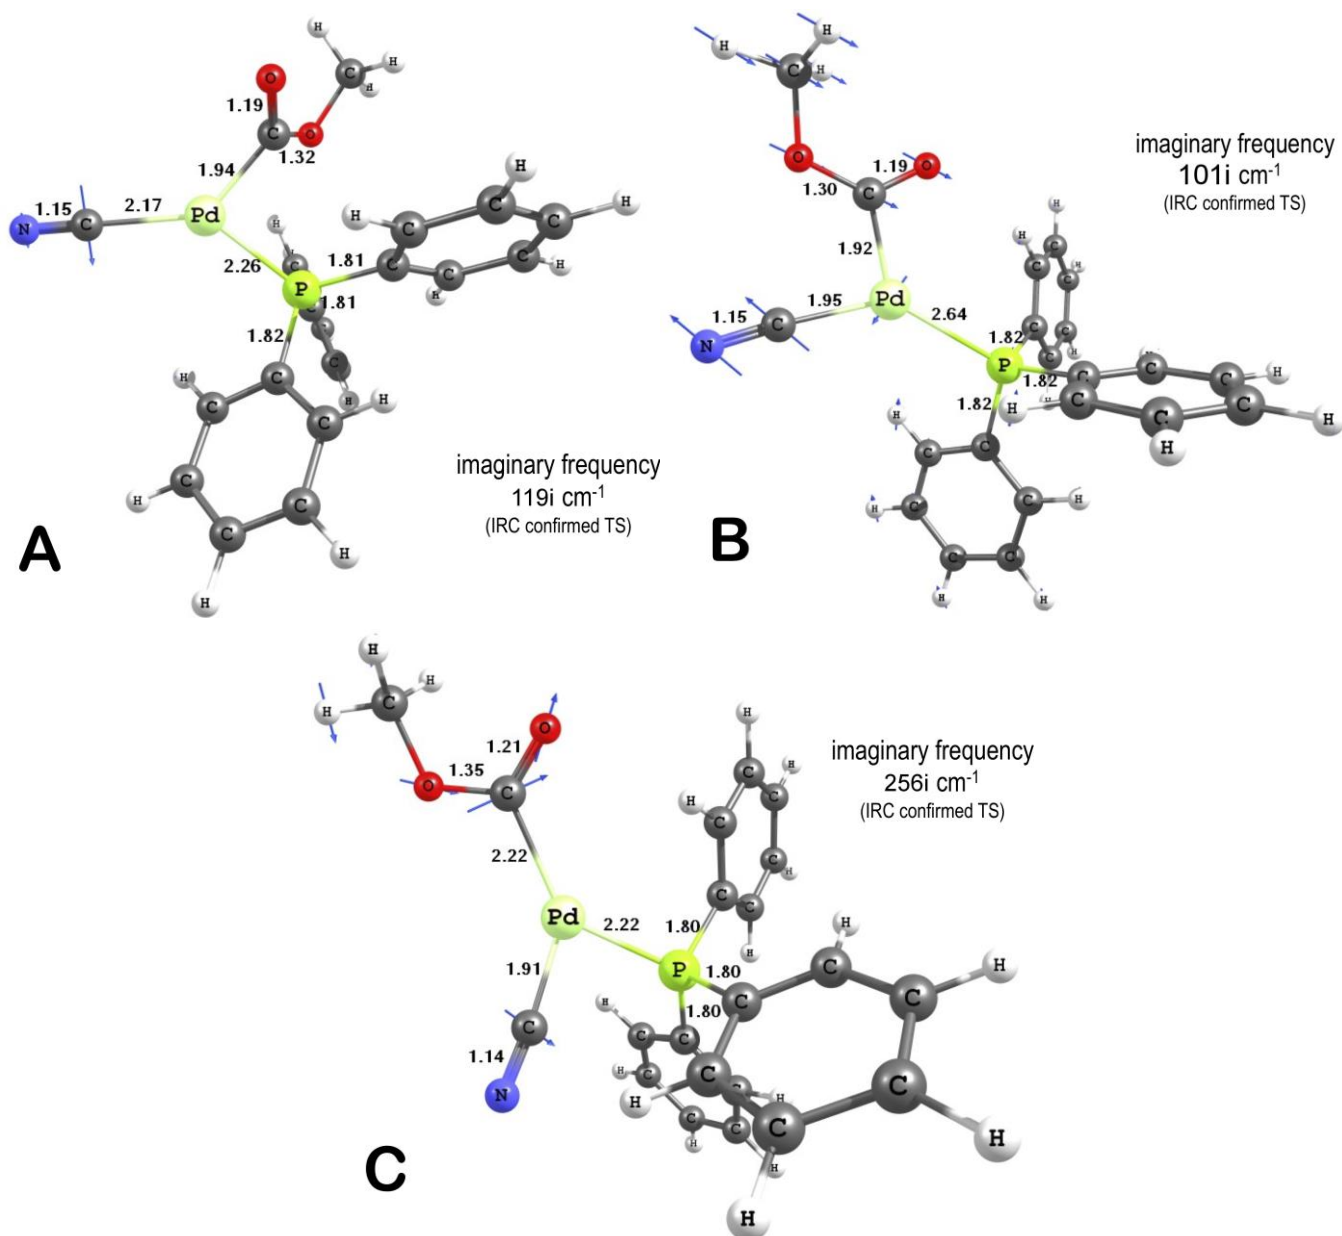

**Figure S3:** Scaled displacement vectors of normal mode displacements with imaginary frequencies for isomerization transition states **trans-cisNP** (A), **cisOP-cisNP** (B), **trans-cisOP** (C) (see atomic coordinates on following pages)

### trans-cisNP

44

2cNP\_TS, electronic energy = -1485.20882949 a.u.

|    |              |              |              |
|----|--------------|--------------|--------------|
| C  | 1.914601862  | 1.660434345  | 0.372539000  |
| O  | 2.485341896  | 2.076664155  | 1.327665052  |
| O  | 2.496944827  | 1.174737311  | -0.704778017 |
| C  | 3.929895827  | 1.161888121  | -0.705244983 |
| H  | 4.213824793  | 0.739413104  | -1.655583000 |
| H  | 4.311000965  | 2.167945052  | -0.605786948 |
| H  | 4.293163724  | 0.550154035  | 0.108270000  |
| Pd | -0.002345207 | 1.924760879  | 0.317248983  |
| P  | -0.184629879 | -0.308191138 | -0.003806017 |
| C  | -1.759794931 | -0.769974069 | 0.771923983  |
| C  | -2.908379914 | -0.088328104 | 0.382547896  |
| C  | -1.855524965 | -1.754924983 | 1.742985069  |
| C  | -4.125669931 | -0.390939017 | 0.951559931  |
| H  | -2.856031914 | 0.683207776  | -0.364340242 |
| C  | -3.078535983 | -2.054604931 | 2.311877052  |
| H  | -0.983228965 | -2.293783965 | 2.059465121  |
| C  | -4.212791965 | -1.374711931 | 1.918968000  |

|   |              |              |              |
|---|--------------|--------------|--------------|
| H | -5.003709914 | 0.146602983  | 0.644454862  |
| H | -3.140493000 | -2.820553879 | 3.063146104  |
| H | -5.162219965 | -1.606844879 | 2.365907000  |
| C | -0.378455931 | -0.758159086 | -1.748872017 |
| C | -1.129212965 | -1.871042069 | -2.107513035 |
| C | 0.213682035  | 0.008901948  | -2.740990000 |
| C | -1.272592017 | -2.215945017 | -3.434904035 |
| H | -1.611549948 | -2.464840086 | -1.353085035 |
| C | 0.067280000  | -0.339158017 | -4.069075017 |
| H | 0.785244069  | 0.877794931  | -2.477661000 |
| C | -0.673274035 | -1.450729983 | -4.417222017 |
| H | -1.858129035 | -3.076677000 | -3.701536052 |
| H | 0.525084983  | 0.265267000  | -4.830434000 |
| H | -0.791536069 | -1.716129948 | -5.452037035 |
| C | 1.060320086  | -1.418383121 | 0.704621000  |
| C | 1.523207086  | -1.160439069 | 1.988950983  |
| C | 1.555089069  | -2.513599138 | 0.014412017  |
| C | 2.450797069  | -1.993745052 | 2.576764017  |
| H | 1.165496086  | -0.303108035 | 2.530089948  |
| C | 2.490900052  | -3.342374121 | 0.603041052  |
| H | 1.220161052  | -2.722785155 | -0.983543965 |

|   |              |              |             |
|---|--------------|--------------|-------------|
| C | 2.936378052  | -3.086842086 | 1.883822052 |
| H | 2.800103069  | -1.784054035 | 3.570978000 |
| H | 2.870562052  | -4.186629138 | 0.057161069 |
| H | 3.664387052  | -3.732671086 | 2.339938069 |
| C | -1.313600016 | 3.650786794  | 0.271234121 |
| N | -2.004143603 | 4.565956345  | 0.219513052 |

## cisOP-cisNP

44

2cNPiso\_TS, electronic energy = -1485.17323031 a.u.

|    |              |              |              |
|----|--------------|--------------|--------------|
| C  | -3.479618275 | -0.354092257 | 0.034484303  |
| O  | -3.849687660 | 0.669276688  | 0.559601027  |
| O  | -4.407375431 | -1.214686642 | -0.447423395 |
| C  | -5.773589156 | -0.862581816 | -0.286413697 |
| H  | -6.344683312 | -1.675056541 | -0.711454605 |
| H  | -6.023407367 | -0.741669633 | 0.760024000  |
| H  | -6.001029000 | 0.060666275  | -0.804308092 |
| Pd | -1.338070000 | -0.921402147 | -0.148842605 |
| P  | 0.650700670  | 0.049012514  | 0.005332303  |
| C  | 0.198290395  | 1.752571514  | -0.374586000 |
| C  | -0.914310908 | 2.309788211  | 0.249477697  |
| C  | 0.910978303  | 2.502959908  | -1.301519395 |
| C  | -1.295188000 | 3.601949211  | -0.044046000 |
| H  | -1.503626119 | 1.744100000  | 0.948410578  |
| C  | 0.527782303  | 3.797285908  | -1.583492000 |
| H  | 1.763489303  | 2.082619605  | -1.799710092 |
| C  | -0.573655697 | 4.347000908  | -0.955981303 |
| H  | -2.161767303 | 4.018316514  | 0.434621395  |
| H  | 1.087451303  | 4.374036605  | -2.296671303 |
| H  | -0.873483697 | 5.353776908  | -1.183312605 |
| C  | 1.309407184  | 0.012171000  | 1.683860000  |
| C  | 1.651687092  | 1.190983000  | 2.332228697  |
| C  | 1.504926395  | -1.204937000 | 2.326231000  |
| C  | 2.184582000  | 1.151791000  | 3.605161395  |
| H  | 1.504522486  | 2.139089000  | 1.851492000  |
| C  | 2.040804000  | -1.236047000 | 3.595424697  |
| H  | 1.239516395  | -2.124369303 | 1.839722303  |
| C  | 2.379217000  | -0.059409000 | 4.237016395  |
| H  | 2.444207000  | 2.069204000  | 4.100522092  |
| H  | 2.186905303  | -2.180871000 | 4.085464395  |
| H  | 2.790061605  | -0.087817000 | 5.229744395  |
| C  | 1.965147578  | -0.420810000 | -1.130413000 |
| C  | 1.640023789  | -0.827220000 | -2.417047303 |
| C  | 3.295615578  | -0.342785000 | -0.749951395 |
| C  | 2.636568395  | -1.141910697 | -3.314324697 |
| H  | 0.610689092  | -0.911424000 | -2.714689908 |
| C  | 4.290992184  | -0.663655697 | -1.651782092 |
| H  | 3.559828275  | -0.040904000 | 0.246047605  |
| C  | 3.962769092  | -1.060908697 | -2.931879092 |
| H  | 2.378560697  | -1.462147697 | -4.306757000 |
| H  | 5.320558184  | -0.608009395 | -1.349704486 |
| H  | 4.738652697  | -1.316256395 | -3.630319789 |
| C  | -0.269900404 | -2.508897578 | -0.201601605 |
| N  | 0.282226330  | -3.511467514 | -0.222120303 |



## trans-cisOP

44

2cOP\_TS, electronic energy = -1485.20838409 a.u.

|    |              |              |              |
|----|--------------|--------------|--------------|
| C  | 3.355638173  | -0.562963636 | 0.044325921  |
| O  | 2.983084332  | -1.697561636 | 0.044540841  |
| O  | 4.584756332  | -0.149831636 | 0.044903000  |
| C  | 5.601849332  | -1.161247556 | 0.044656921  |
| H  | 6.536447332  | -0.625192477 | 0.047213921  |
| H  | 5.510853411  | -1.776991636 | 0.928048921  |
| H  | 5.513863411  | -1.773265556 | -0.841656079 |
| Pd | 1.806729762  | 0.566918907  | 0.043058079  |
| P  | -0.768443603 | -0.015704271 | 0.005052000  |
| C  | -1.781434285 | 1.433424206  | -0.417717841 |
| C  | -1.274086206 | 2.332012206  | -1.347003841 |
| C  | -3.022694285 | 1.679353364  | 0.149525159  |
| C  | -2.000879047 | 3.444890285  | -1.715455762 |
| H  | -0.302817206 | 2.167078047  | -1.779723841 |
| C  | -3.745964126 | 2.798415444  | -0.213978841 |
| H  | -3.425742444 | 1.003350444  | 0.880461079  |
| C  | -3.238393047 | 3.679966444  | -1.147825841 |
| H  | -1.594839967 | 4.133374285  | -2.433623762 |
| H  | -4.704912126 | 2.981721523  | 0.235593159  |
| H  | -3.800852967 | 4.552597523  | -1.426070841 |
| C  | -1.210025000 | -1.286988874 | -1.217300079 |
| C  | -2.351150079 | -1.217096636 | -2.002053000 |
| C  | -0.352195000 | -2.369602794 | -1.366565397 |
| C  | -2.634620238 | -2.217048397 | -2.912077159 |
| H  | -3.019190000 | -0.380982556 | -1.910961682 |
| C  | -0.642323159 | -3.371542636 | -2.269389556 |
| H  | 0.549585079  | -2.428641874 | -0.782655556 |
| C  | -1.783874238 | -3.296345397 | -3.044391397 |
| H  | -3.520256238 | -2.150083238 | -3.517476079 |
| H  | 0.028564762  | -4.204528636 | -2.374502794 |
| H  | -2.005314397 | -4.072690238 | -3.754073556 |
| C  | -1.435519841 | -0.617483794 | 1.585466079  |
| C  | -0.971180841 | -0.026795556 | 2.753763921  |
| C  | -2.375349079 | -1.632985556 | 1.672972159  |
| C  | -1.450498000 | -0.430242159 | 3.982307000  |
| H  | -0.229796603 | 0.751434206  | 2.705178841  |
| C  | -2.847836238 | -2.042980159 | 2.904865238  |
| H  | -2.738336079 | -2.111320636 | 0.782447238  |
| C  | -2.389685238 | -1.441201921 | 4.059592159  |
| H  | -1.084159000 | 0.037401000  | 4.877867921  |
| H  | -3.573658397 | -2.833848921 | 2.959828397  |
| H  | -2.757504397 | -1.762327603 | 5.017133159  |
| C  | 2.906443463  | 2.178964000  | 0.031828921  |
| N  | 3.479293622  | 3.170617921  | 0.023100921  |

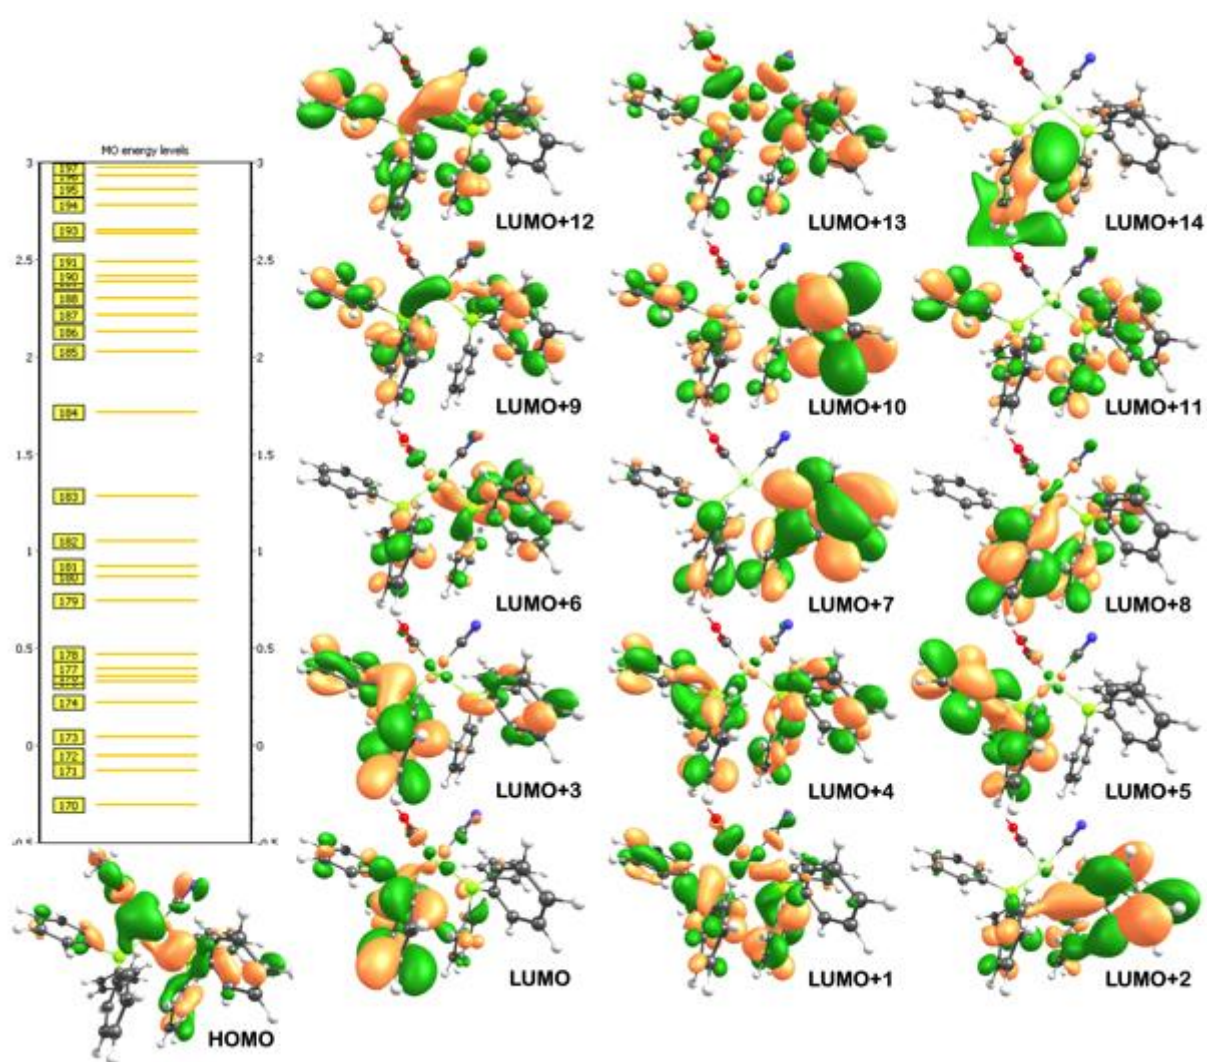

**Figure S4:** Molecular orbital analysis of complex **2c2P** from BHandHLYP/def2TZVP/PCM(toluene) calculation

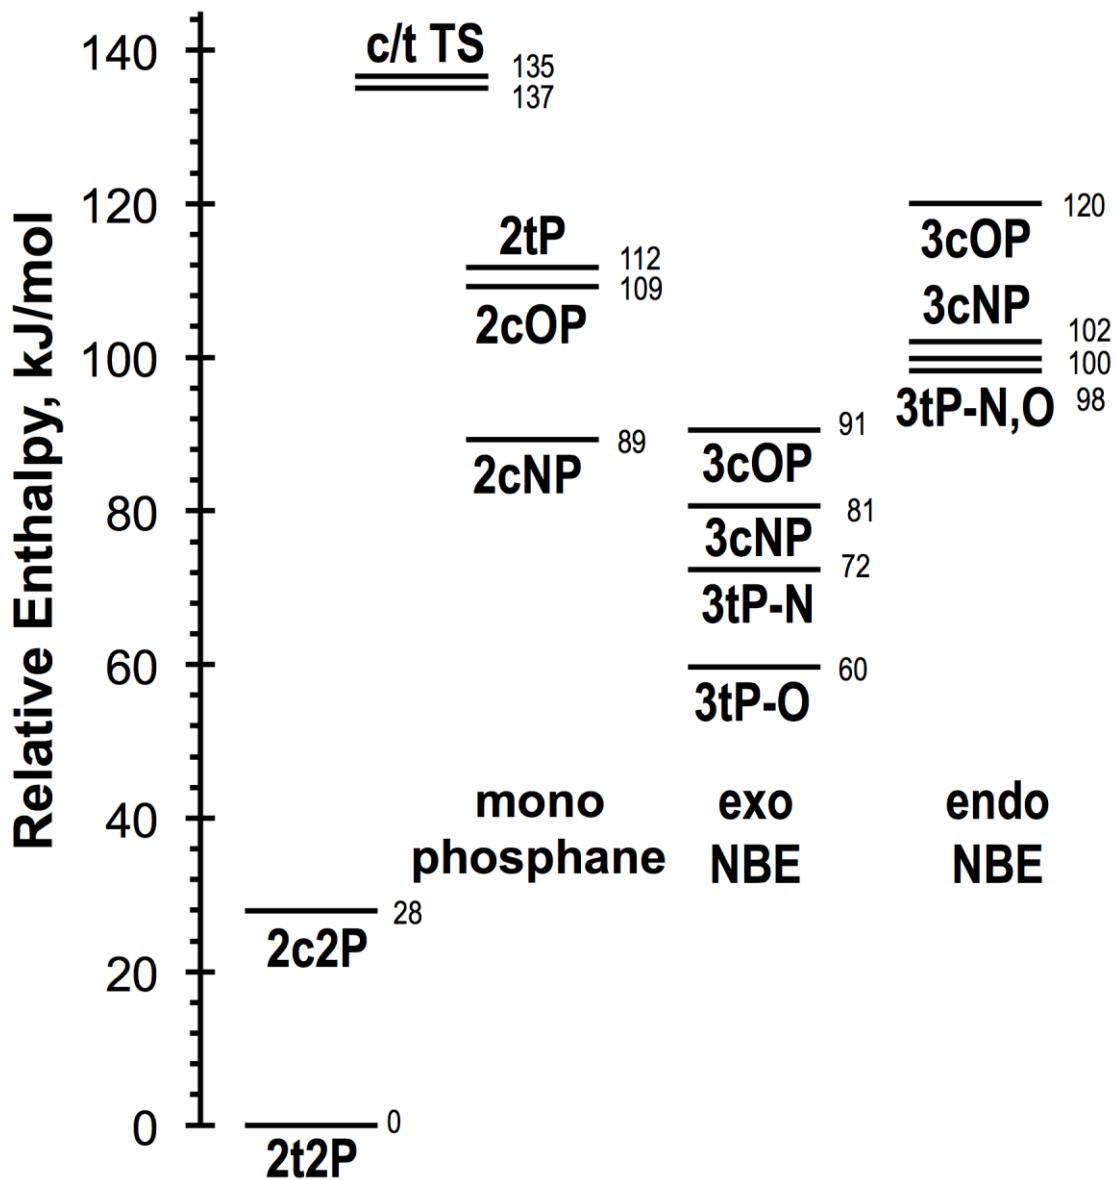

**Figure S5:** Relative enthalpy surface of norbornene complexes (**3**) of the 14 electron Pd<sup>II</sup> complexes (**2**) calculated at BHandHLYP/def2TZVP/PCM(toluene) level ('N', and 'O' suffixes refer to the position of the norbornene methylene bridge *versus* CN<sup>-</sup>, and COOMe<sup>-</sup> ligands

Compilation of calculated molecular structures at the BHandHLYP(PCM)/def2TZVP level without truncation.

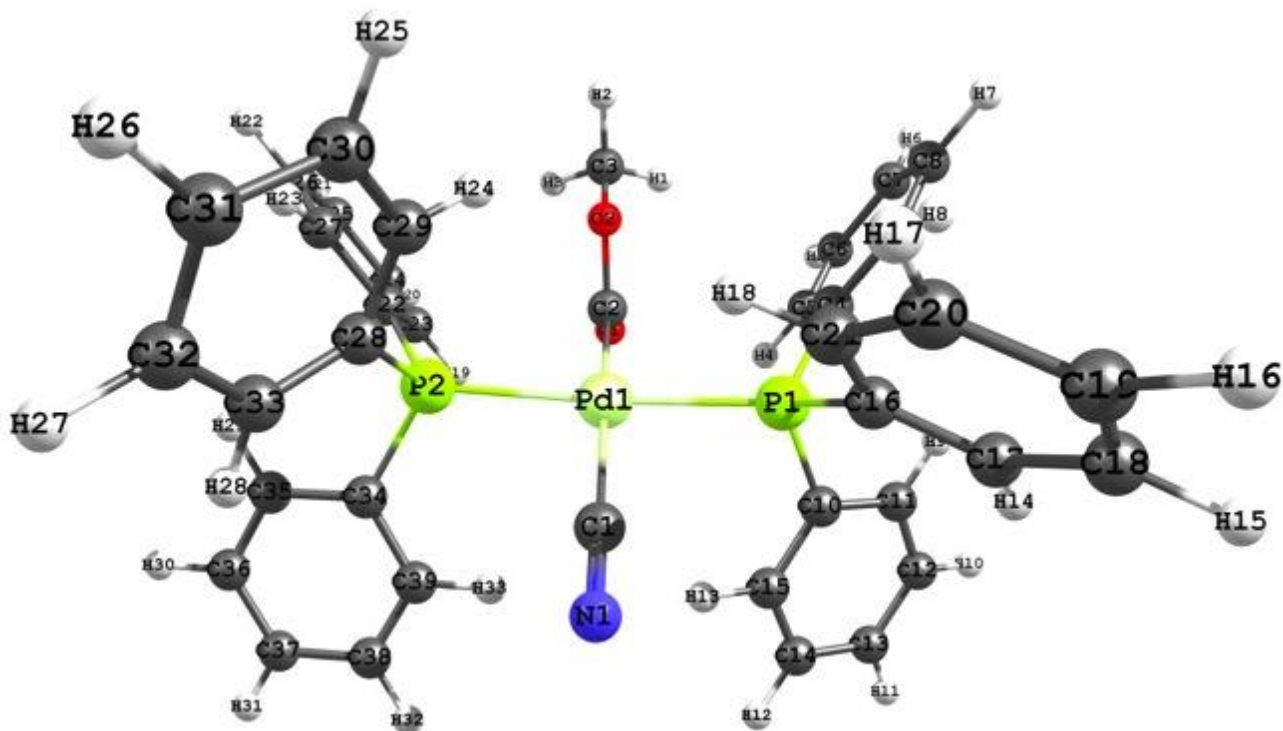

2t2P

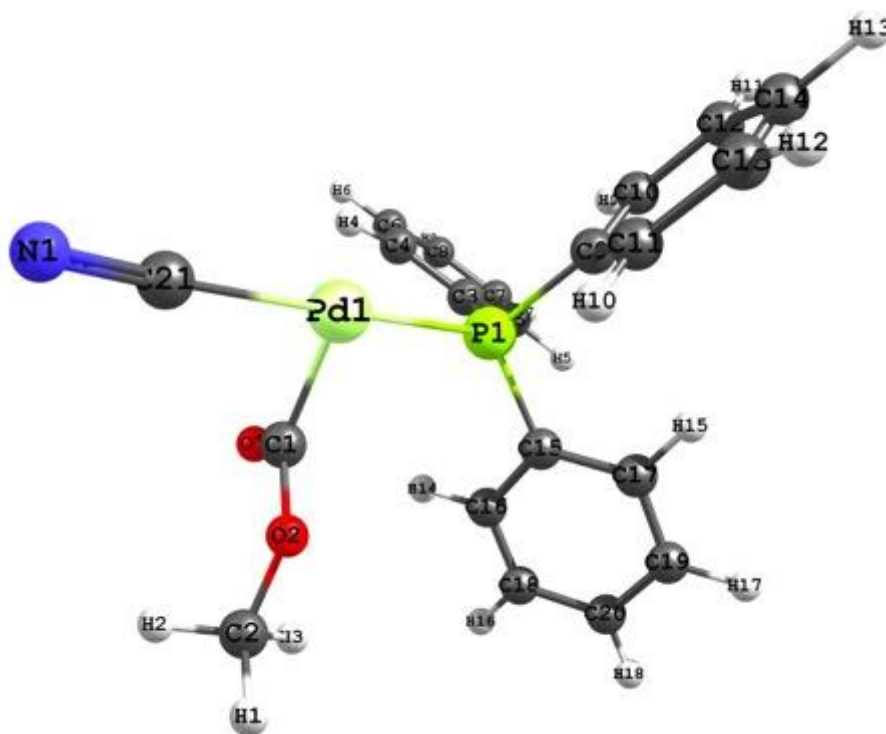

2cNP

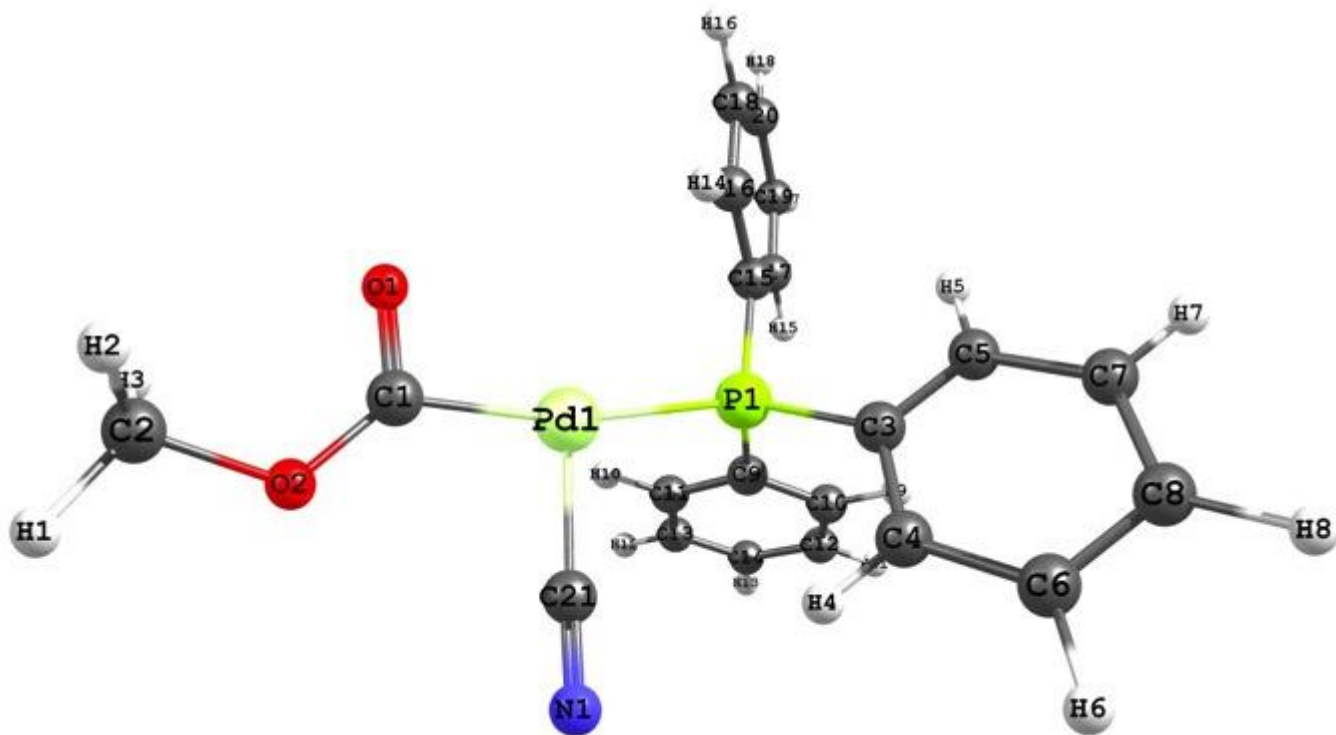

2cOP

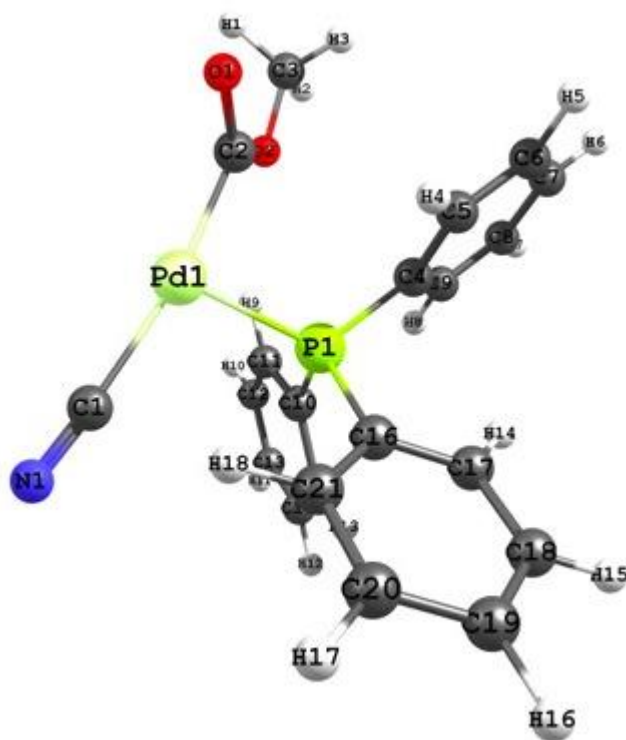

2tP

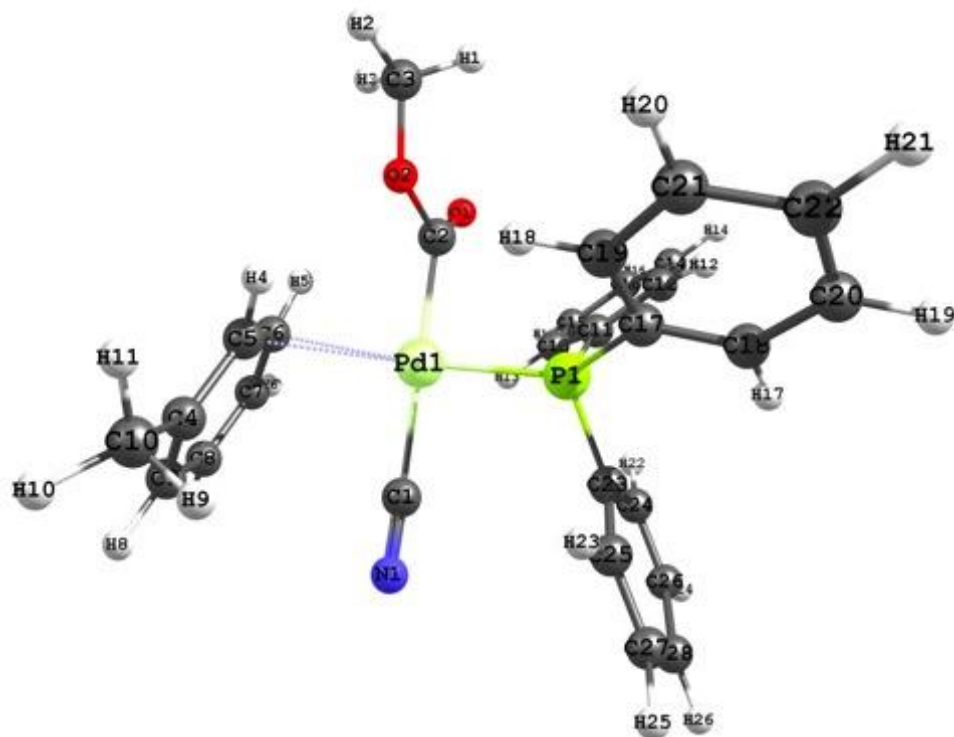

2tPT

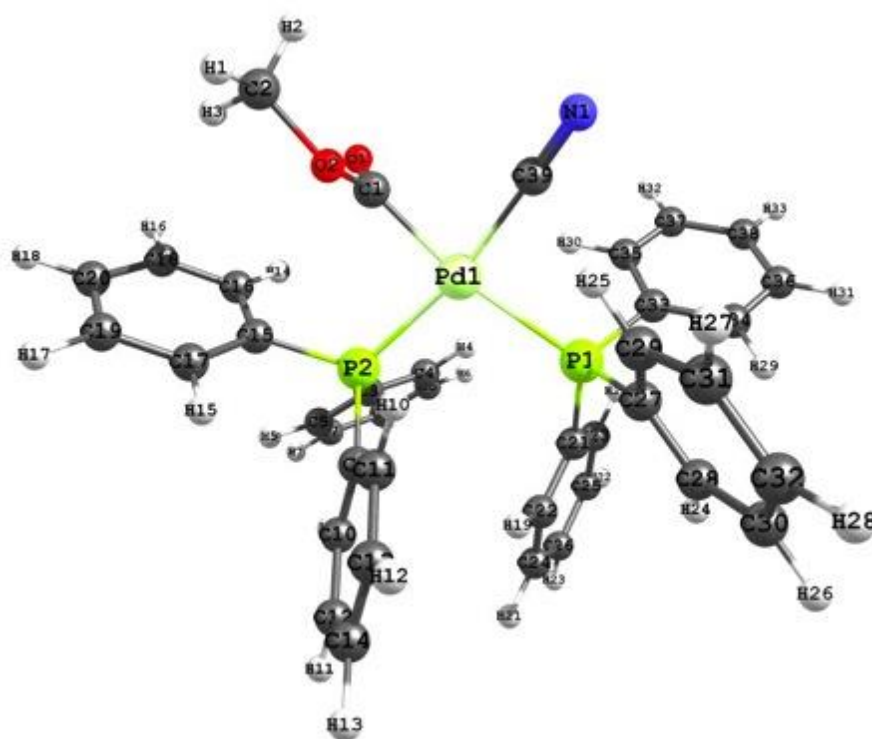

2c2P

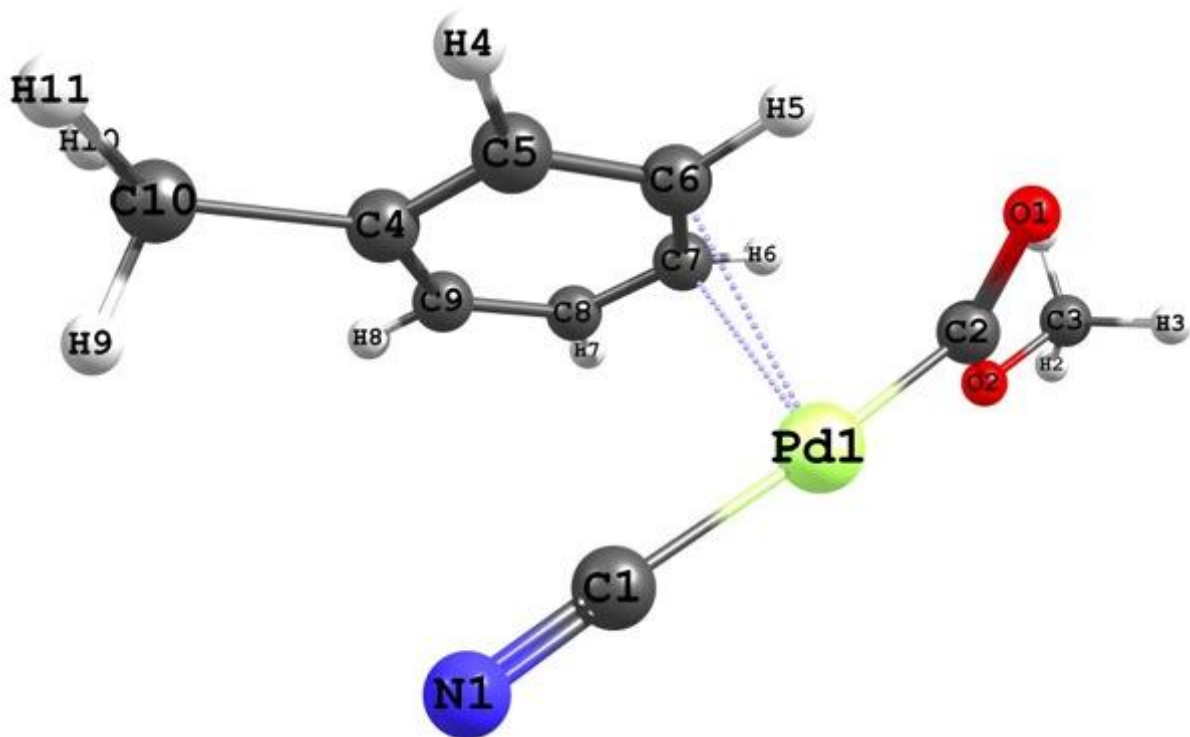

2tT-O

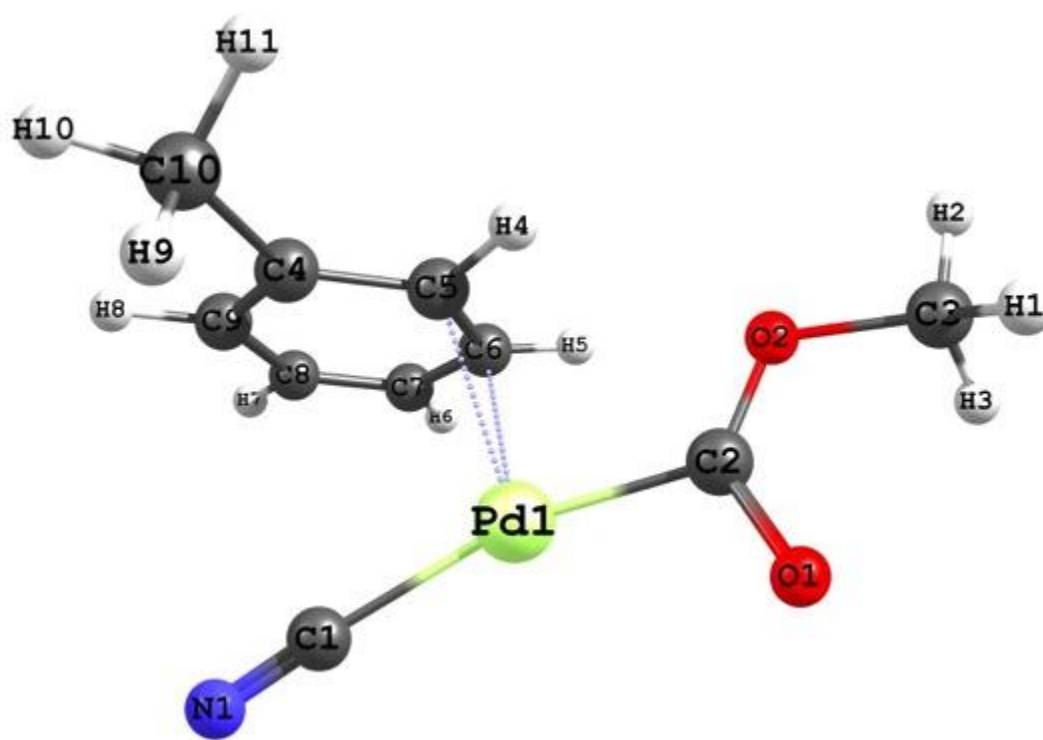

2tT-OMe

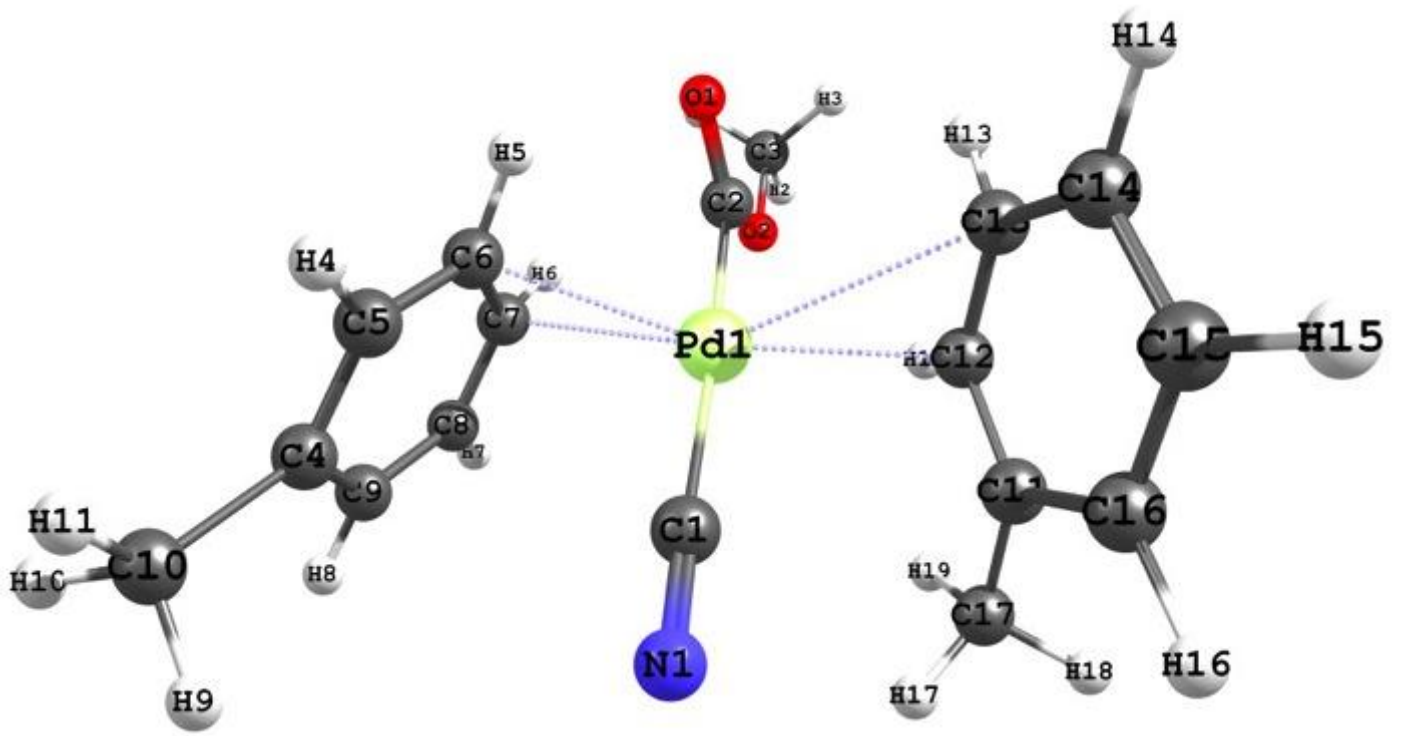

2t2T

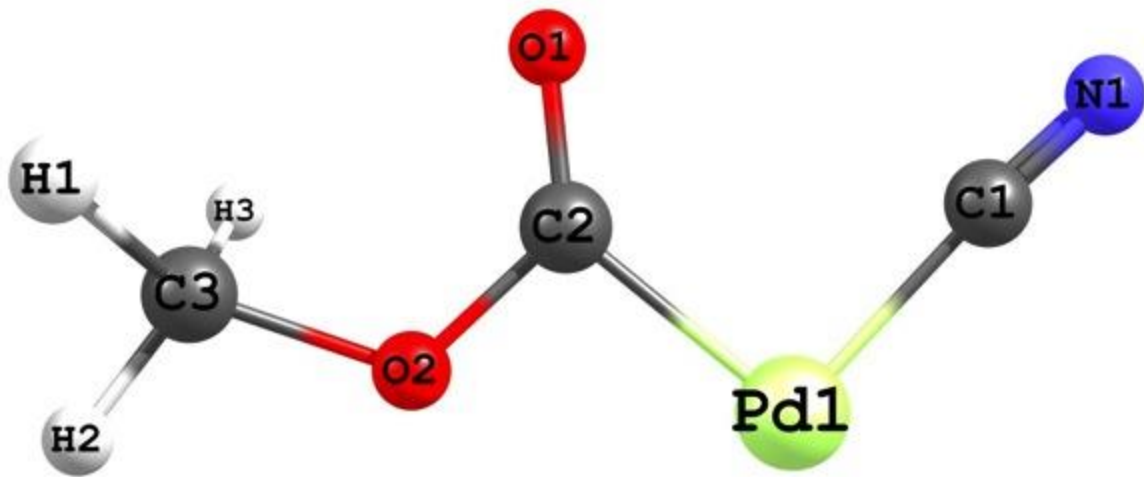

2c

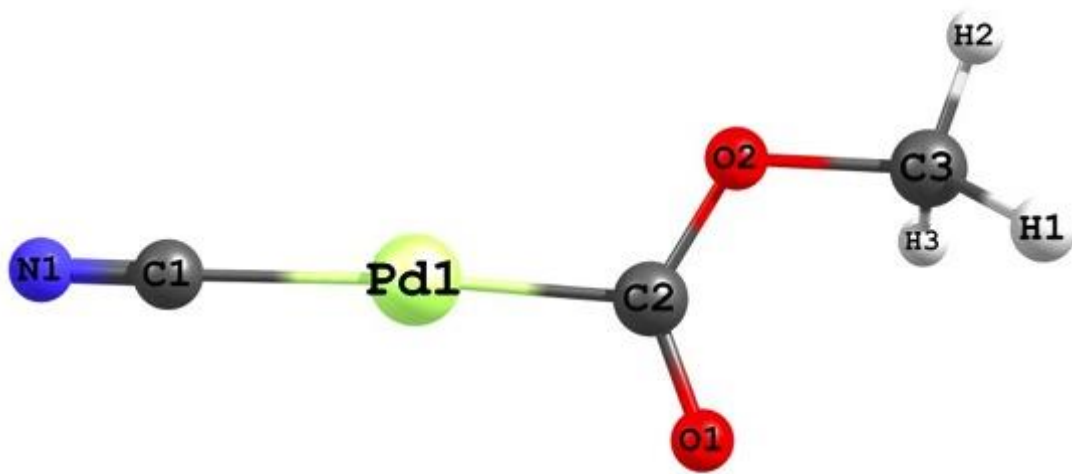

2t



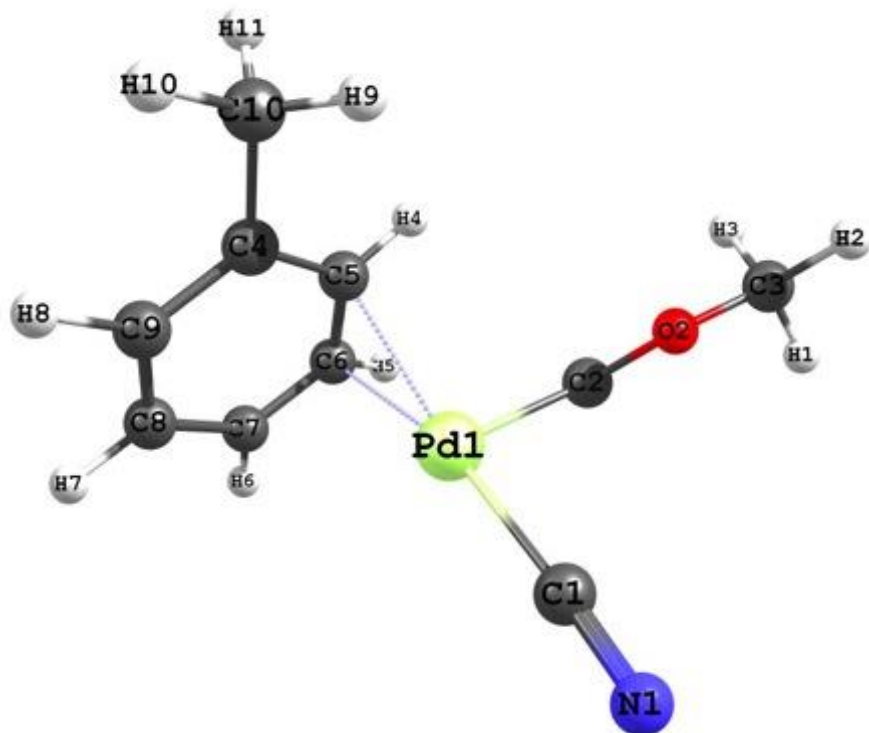

2cNT

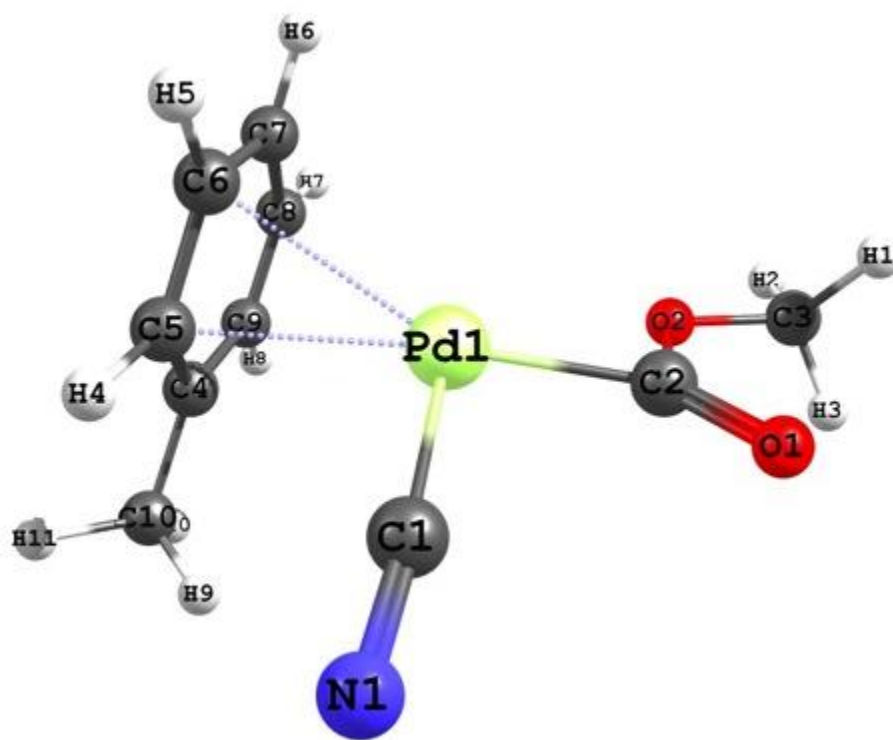

2cOT

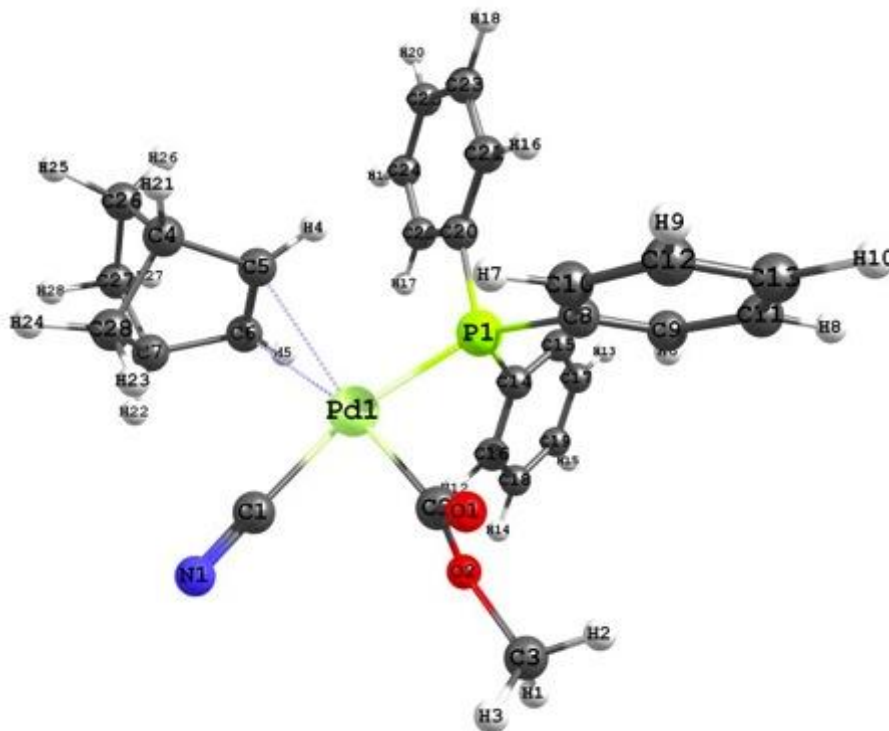

exo-3cNP

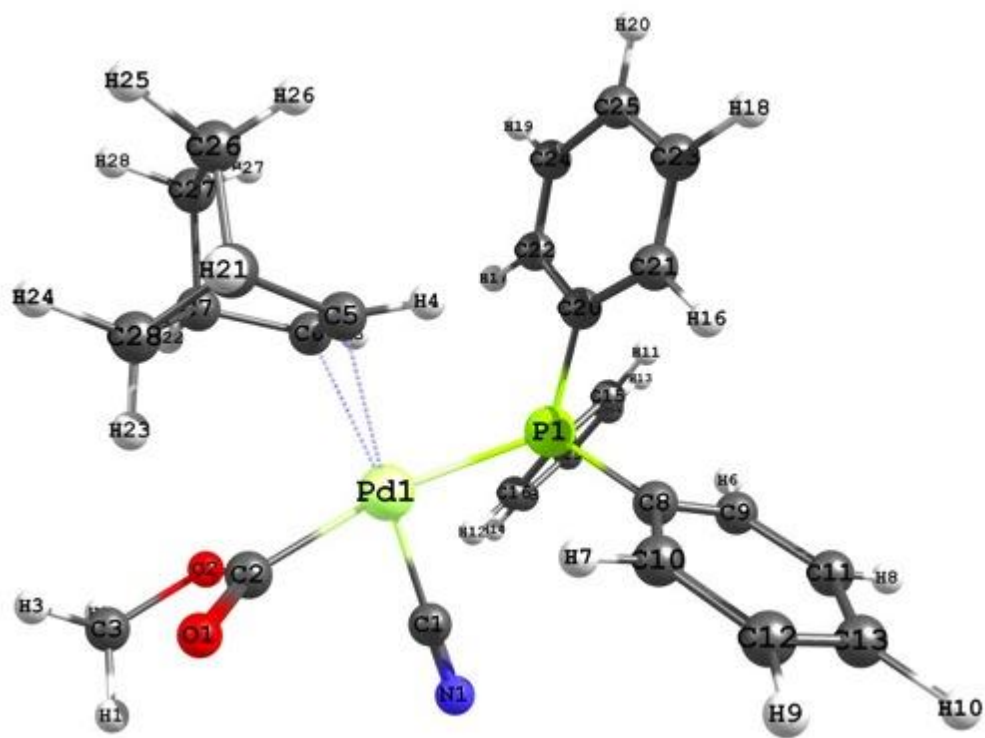

exo-3cOP

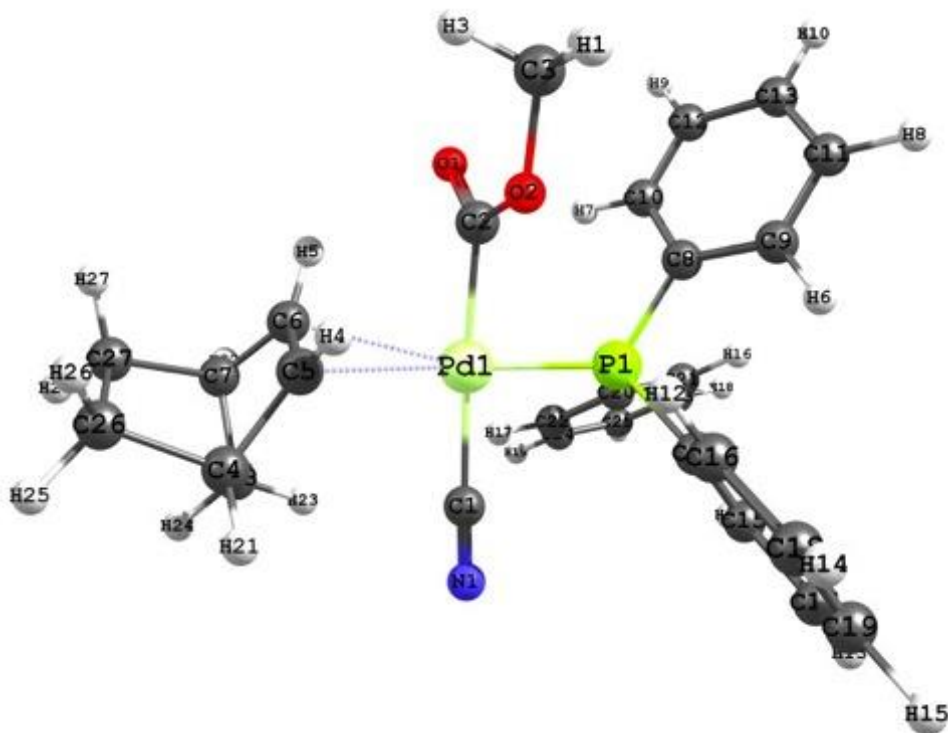

exo-3tP-N

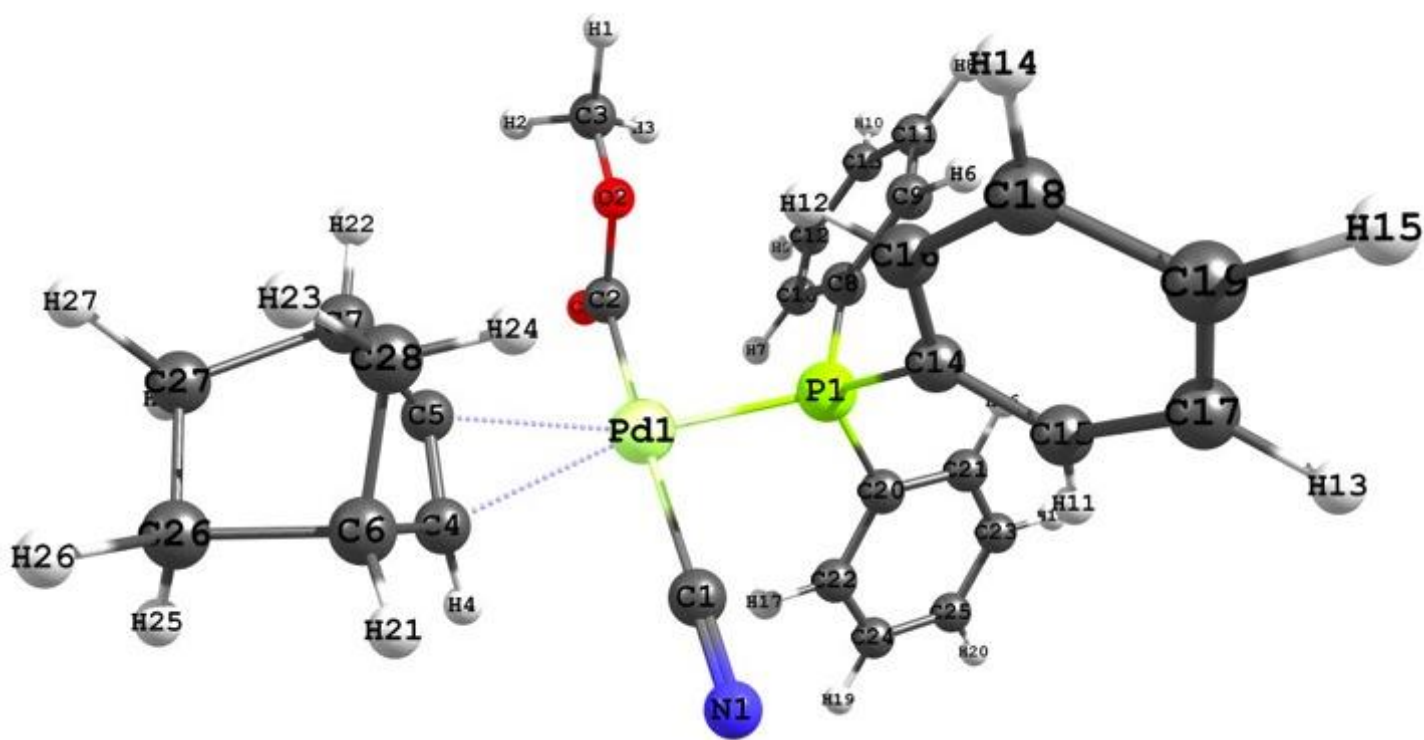

exo-3tP-O



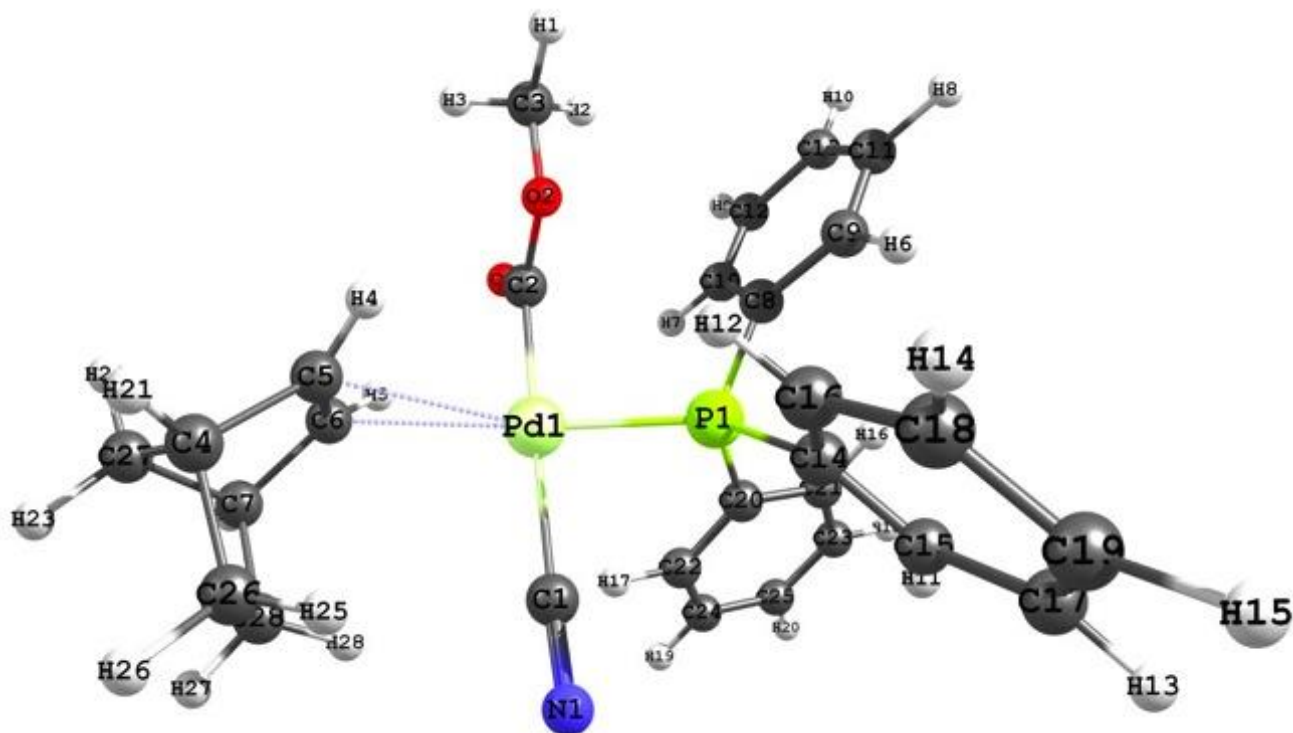

endo-3tP-N

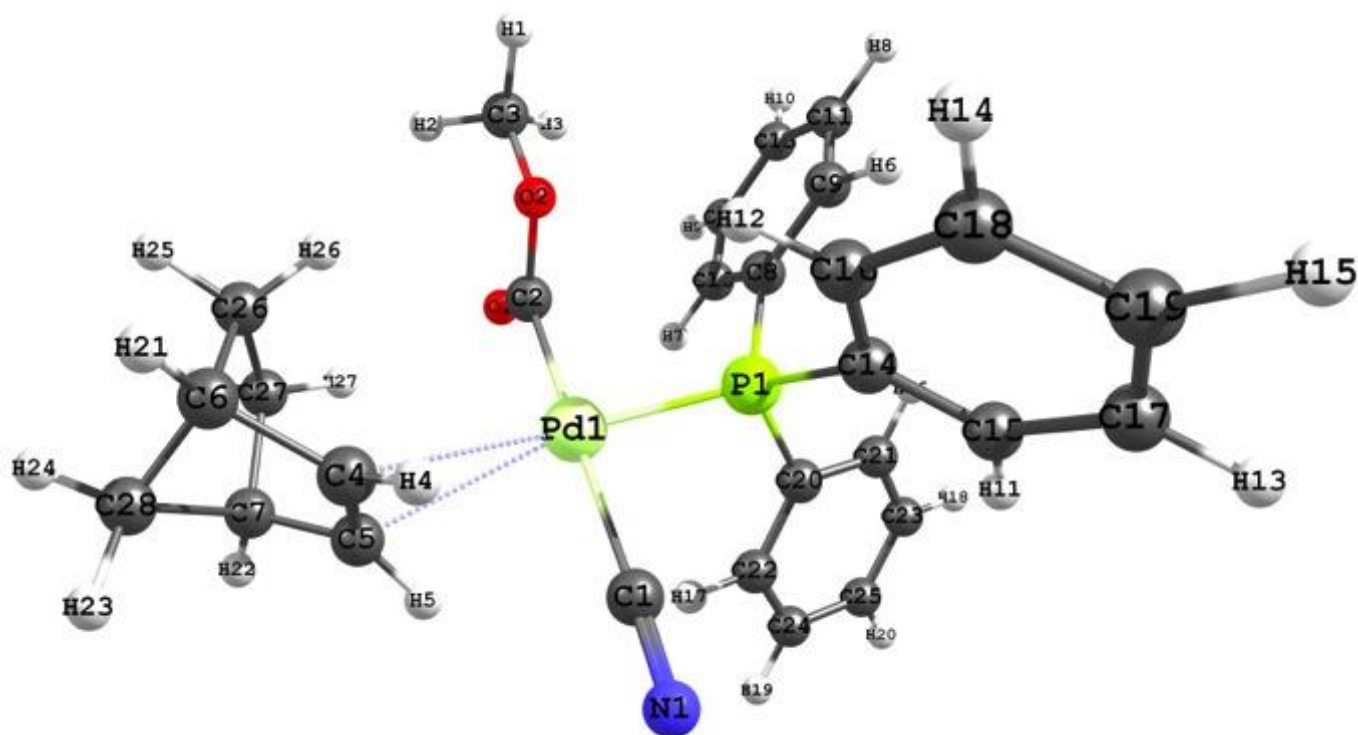

endo-3tP-O

The supplemental file *filename.xyz* contains the computed Cartesian coordinates of all of the molecules reported in this study. This file may be opened as a text file to read the coordinates, or opened directly by a molecular modeling program such as **Mercury** (version 3.3 or later, <http://www.ccdc.cam.ac.uk/pages/Home.aspx>) for visualization and analysis. Electronic energies computed at the BHandHLYP(PCM)/def2TZVP level are shown in the title line of each file.
